# Supplementary material for: LPIAT1/MBOAT7 depletion increases triglyceride synthesis fueled by high phosphatidylinositol turnover
Source: PubMed Central journal article supplement (PMC7788230; doi:10.1136/gutjnl-2020-320646), 2020-04-06
Supplement: gutjnl-2020-320646supp001.pdf [file gutjnl-2020-320646supp001.pdf]

## Supplementary Figure S1

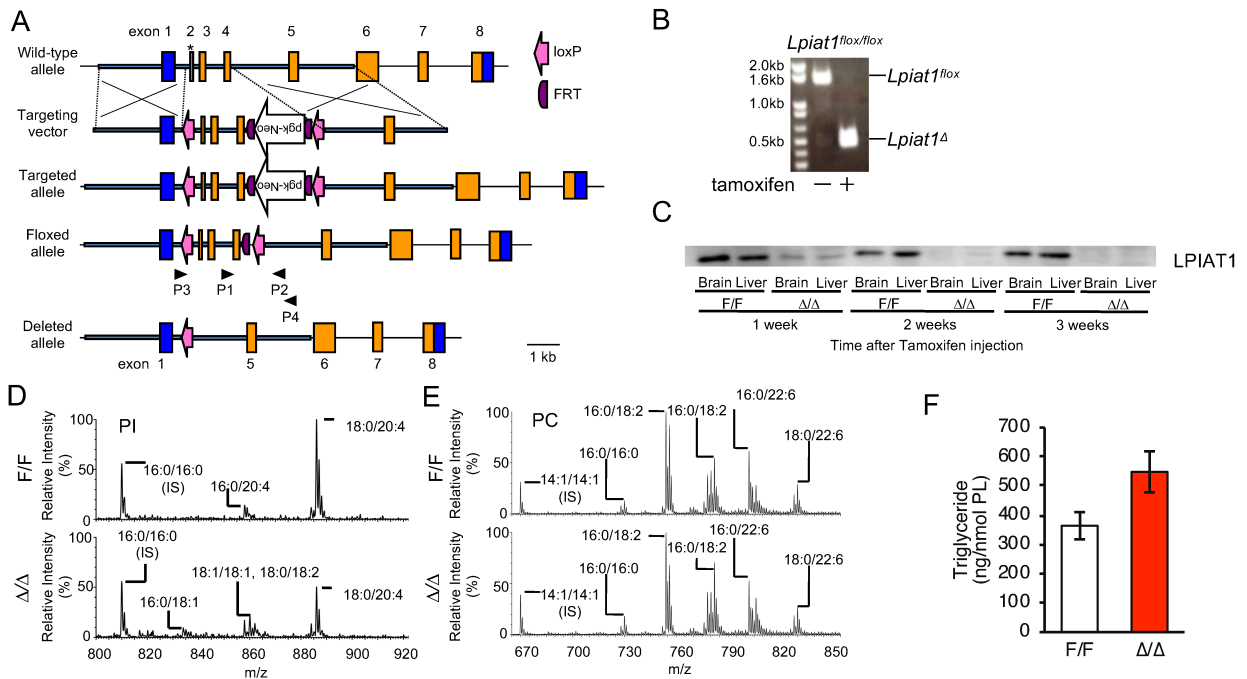

## Supplementary Figure S1.

Generation of tamoxifen-inducible *Lpiat1* knockout mice.

(A) Diagram of the *Lpiat1* genomic locus and the targeting vector. The positions of PCR primers are indicated (P1, P2, P3 and P4) under the diagram of Floxed allele. The mice carrying Floxed allele and deleted allele homozygously in whole bodies are shown as F/F and  $\Delta/\Delta$  respectively. Liver-specific *Lpiat1* deleted mice are shown as LKO. (B) PCR analysis of genomic DNAs from F/F mice injected with tamoxifen or vehicle (corn oil). Similar results were obtained in one additional independent experiment. (C-F) Six weeks old male *Lpiat1*<sup>fl/fl</sup> mice (F/F) and *Ubc-CreERT2*;*Lpiat1*<sup>fl/fl</sup> mice ( $\Delta/\Delta$ ) were treated with tamoxifen for an indicated weeks (C) or 4 weeks (D-F). (C) Western blot of LPIAT1 in brain and liver from F/F and  $\Delta/\Delta$  mice treated with tamoxifen. Similar results were obtained in one additional independent experiment. (D,E) LC-MS spectra of PI (D) and PC (E) species of F/F (top) and  $\Delta/\Delta$  (bottom) liver. Data are representative of three independent experiments. (F) Hepatic triglyceride levels of F/F and  $\Delta/\Delta$  mice treated with tamoxifen (n=3). Values are shown as mean  $\pm$  SEM.

Supplementary Figure S2

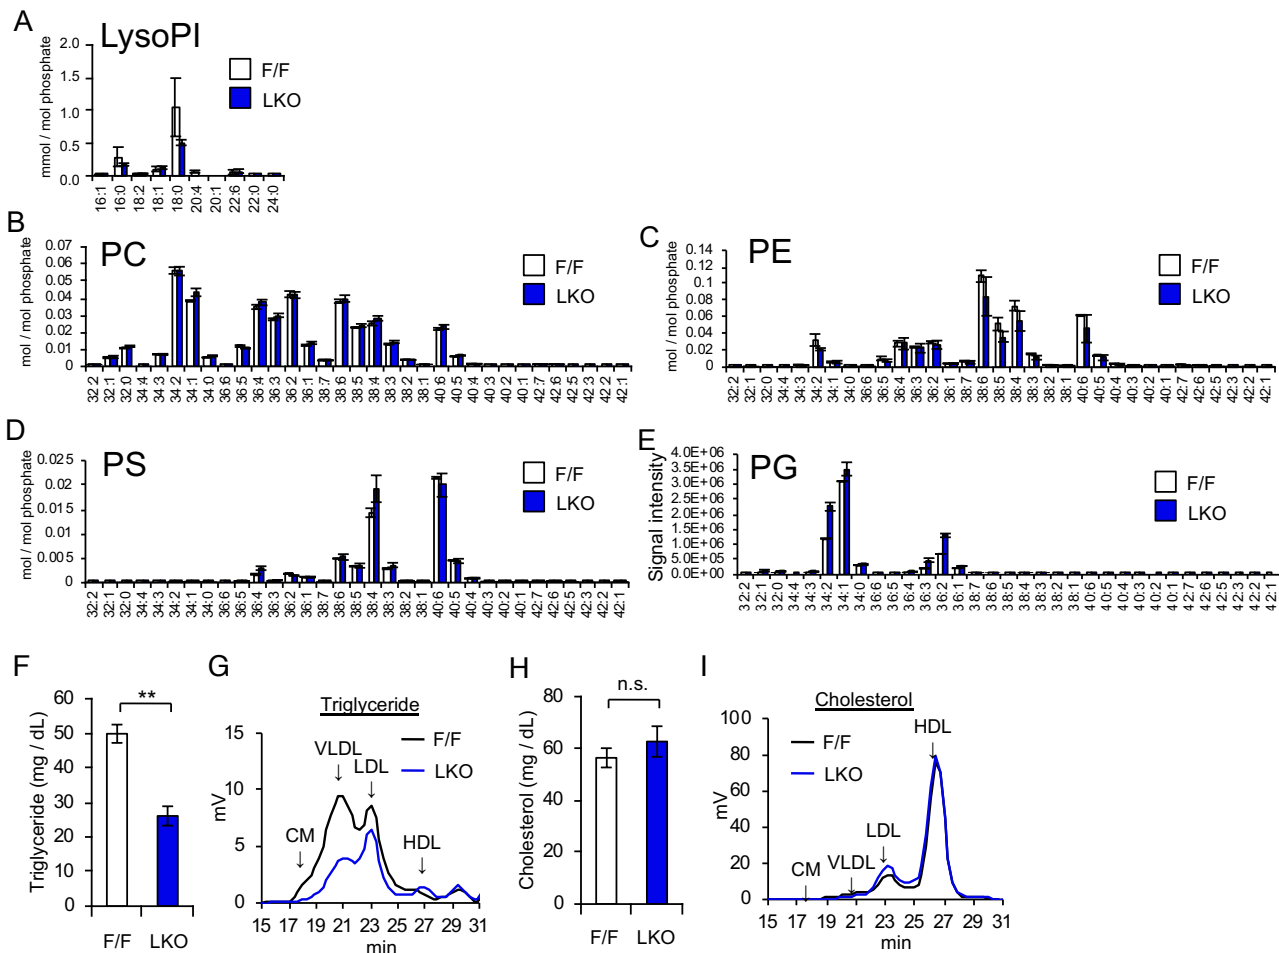

Supplementary Figure S2.

Lipid profiles of hepatocyte-specific *Lp1at1* knockout mice.

(A-E) LC-MS/MS analysis of lyso-phospholipid and phospholipid species in the livers of F/F and LKO mice (n=3).

(F-I) Plasma triglyceride levels (F, G) and cholesterol levels (H, I) of F/F and LKO mice (n=3).

Lipoprotein profiles of plasma from 12-week-old male F/F and LKO mice after 6 h of starvation analyzed by HPLC. CM; chylomicron, VLDL; very low-density lipoprotein, LDL; low-density lipoprotein, HDL; high-density lipoprotein.

Values are shown as mean  $\pm$  SEM. Data were analyzed by unpaired two-tailed Student's *t* test (A, B, C, D, E, F, H): \* $p < 0.05$  and \*\* $p < 0.01$ . n.s., not significant.

Supplementary Figure S3

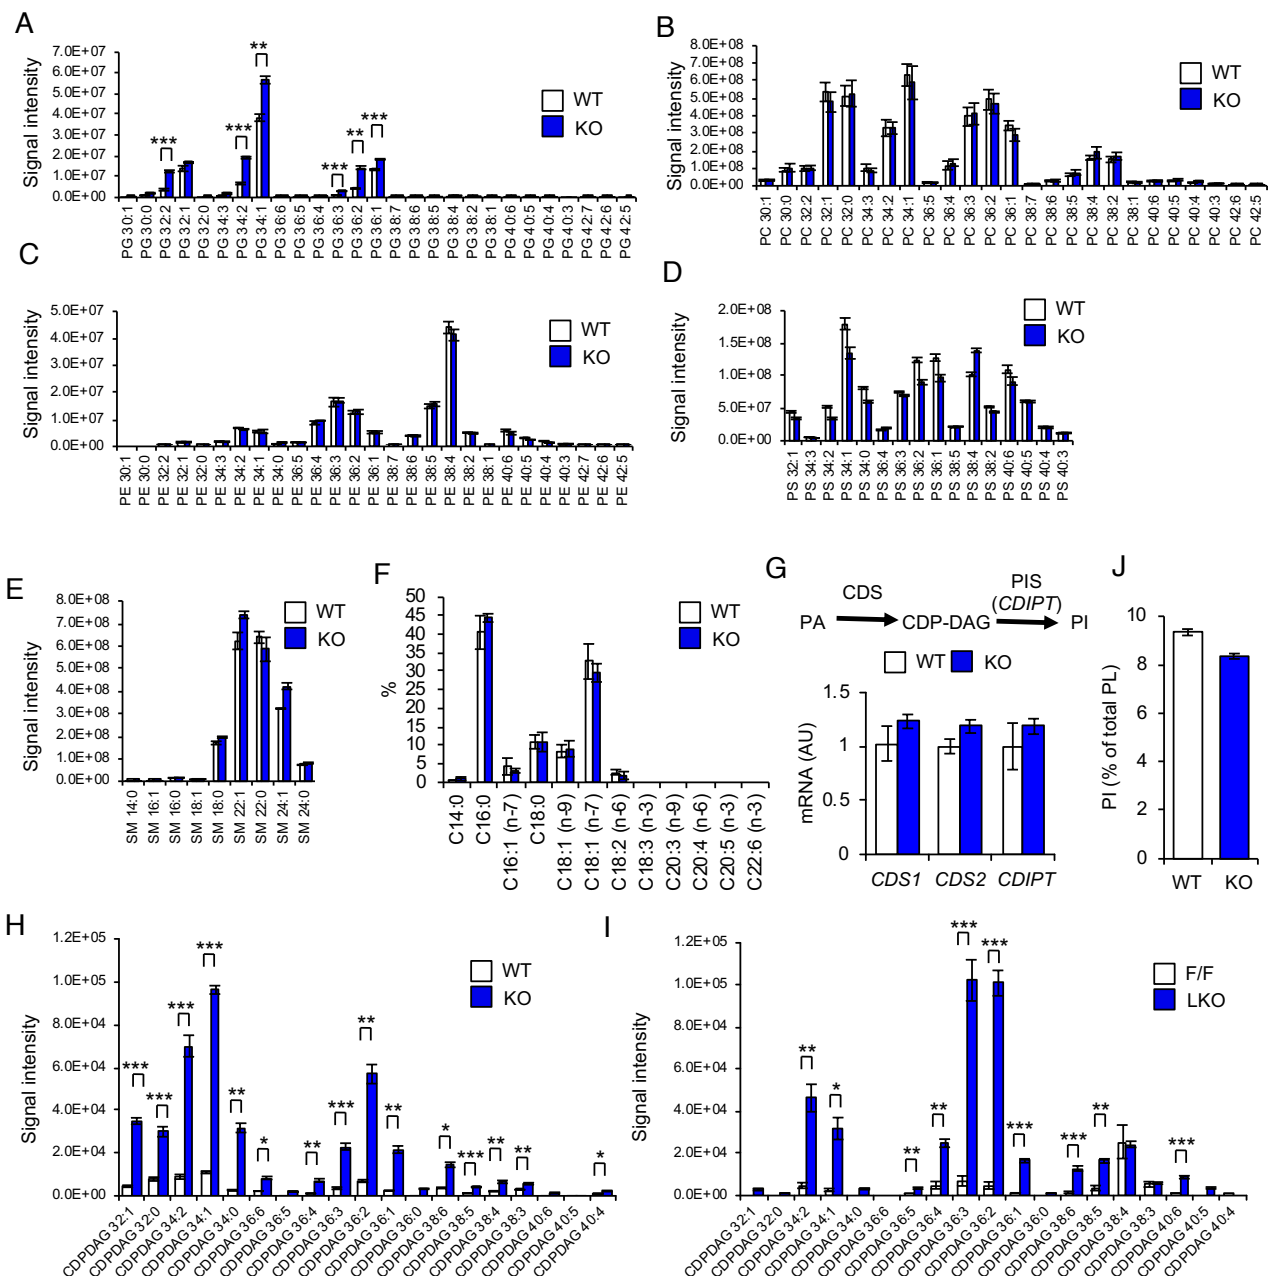

**Supplementary Figure S3.**

Lipid profiles of *LPIAT1* knockout Huh-7 cells.

(A-E) LC-MS/MS analysis of PG (A), PC (B), PE (C), PS (D), and SM (E) species in WT and KO Huh-7 cells (n = 3). (F) Fatty acid esterified to cellular TG of WT and KO cells. Data are expressed as mol% of total fatty acids esterified to TG (n = 3). (G) A scheme diagram of PI synthesis and expression of genes involved in PI synthesis in WT and KO Huh-7 cells (n = 3). (H, I) LC-MS/MS analysis of CDP-DAG species in WT and KO Huh-7 cells (H) and in F/F and LKO mice liver (I) (n = 3). (J) Amount of PI from WT and KO Huh-7 cells (n = 3). Values are shown as mean ± SEM. Data were analyzed by unpaired two-tailed Student's *t* test (A, B, C, D, E, F, G, H, I, J): \*\**p*<0.01 and \*\*\**p*<0.001.

Supplementary Figure S4

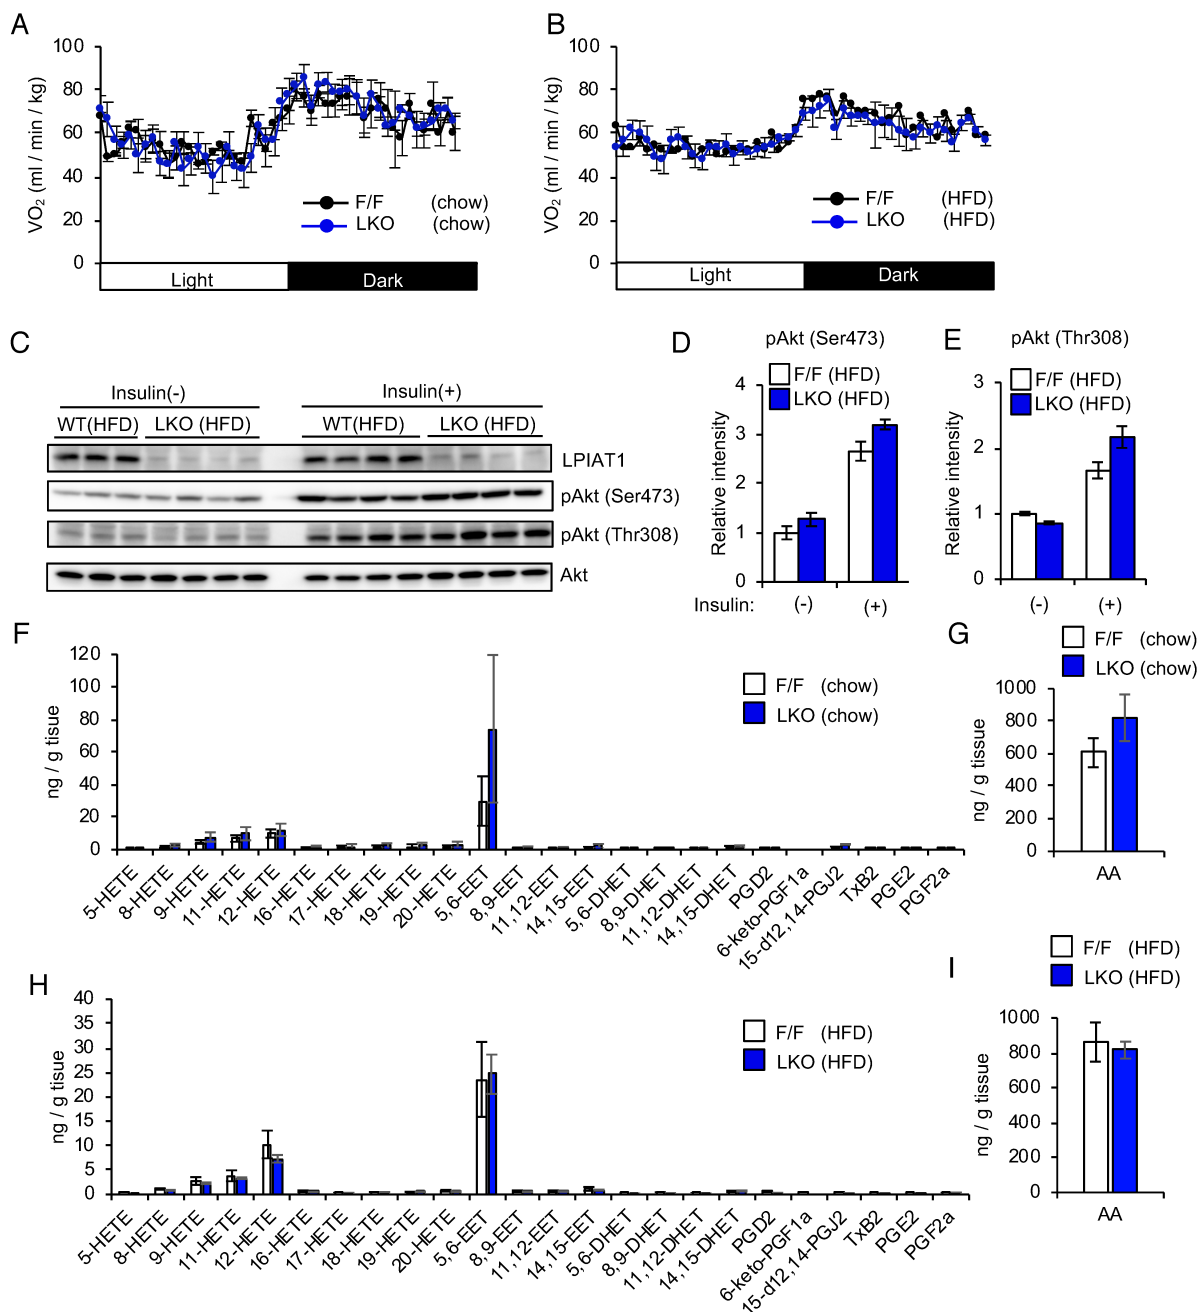

**Supplementary Figure S4.**

Oxygen consumption and liver eicosanoid levels in hepatocyte-specific *Lpiat1* knockout mice fed chow or high fat diet. (A,B)  $VO_2$  of F/F and LKO mice fed chow (A) or HFD (B) ( $n = 5$ ). 8-week-old mice and 12-week-old mice (HFD feeding from 8-week-old) were used to measure  $VO_2$ . (C) Western blot analysis of Akt phosphorylation in F/F and LKO mice fed HFD with or without intraperitoneal injection of insulin (5 mU / g body weight) for 10 min. (D,E) The ratios of p-Akt (Ser473) (D) and p-Akt (Thr308) (E) to Akt were measured, with the value of WT being as 1 ( $n = 3-4$ ). (F,G) Quantification of arachidonic acid (AA) derived mediators (F) and AA (G) of chow-fed F/F and LKO mice liver ( $n = 4$ ). (H,I) Quantification of AA-derived mediators (H) and AA (I) of HFD-fed F/F and LKO mice liver (F/F,  $n = 3$ ; LKO,  $n = 5$ ). Values are shown as mean  $\pm$  SEM. Data were analyzed by unpaired two-tailed Student's *t* test (A, B, D, E, F, G, H, I).

**Supplementary Table S1. Optimized MRM pairs and parameters for lipids.**

|             | m/z       |         | DP (V) | EP (V) | CE (V) | CXP (V) |
|-------------|-----------|---------|--------|--------|--------|---------|
|             | Precursor | Product |        |        |        |         |
| CDPDAG 32:1 | 950.5     | 384     | -180   | -10    | -58    | -11     |
| CDPDAG 32:0 | 952.5     | 384     | -180   | -10    | -58    | -11     |
| CDPDAG 34:2 | 976.5     | 384     | -180   | -10    | -58    | -11     |
| CDPDAG 34:1 | 978.5     | 384     | -180   | -10    | -58    | -11     |
| CDPDAG 34:0 | 980.5     | 384     | -180   | -10    | -58    | -11     |
| CDPDAG 36:6 | 996.5     | 384     | -180   | -10    | -58    | -11     |
| CDPDAG 36:5 | 998.5     | 384     | -180   | -10    | -58    | -11     |
| CDPDAG 36:4 | 1000.5    | 384     | -180   | -10    | -58    | -11     |
| CDPDAG 36:3 | 1002.5    | 384     | -180   | -10    | -58    | -11     |
| CDPDAG 36:2 | 1004.5    | 384     | -180   | -10    | -58    | -11     |
| CDPDAG 36:1 | 1006.5    | 384     | -180   | -10    | -58    | -11     |
| CDPDAG 36:0 | 1008.5    | 384     | -180   | -10    | -58    | -11     |
| CDPDAG 38:6 | 1024.5    | 384     | -180   | -10    | -58    | -11     |
| CDPDAG 38:5 | 1026.5    | 384     | -180   | -10    | -58    | -11     |
| CDPDAG 38:4 | 1028.5    | 384     | -180   | -10    | -58    | -11     |
| CDPDAG 38:3 | 1030.5    | 384     | -180   | -10    | -58    | -11     |
| CDPDAG 40:6 | 1052.5    | 384     | -180   | -10    | -58    | -11     |
| CDPDAG 40:5 | 1054.5    | 384     | -180   | -10    | -58    | -11     |
| CDPDAG 40:4 | 1056.5    | 384     | -180   | -10    | -58    | -11     |

|                | m/z       |         | DP (V) | EP (V) | CE (V) | CXP (V) | Retention time (min) |
|----------------|-----------|---------|--------|--------|--------|---------|----------------------|
|                | Precursor | Product |        |        |        |         |                      |
| AA             | 303       | 259     | -110   | -10    | -18    | -9      | 25.95                |
| 5-HETE         | 319       | 115     | -45    | -10    | -22    | -21     | 19.68                |
| 8-HETE         | 319       | 155     | -50    | -10    | -18    | -17     | 19.35                |
| 9-HETE         | 319       | 123     | -35    | -10    | -24    | -11     | 19.49                |
| 11-HETE        | 319       | 167     | -50    | -10    | -22    | -13     | 19.11                |
| 12-HETE        | 319       | 179     | -60    | -10    | -20    | -7      | 19.38                |
| 16-HETE        | 319       | 233     | -55    | -10    | -20    | -9      | 18.29                |
| 17-HETE        | 319       | 247     | -55    | -10    | -20    | -7      | 18.24                |
| 18-HETE        | 319       | 261     | -90    | -10    | -22    | -9      | 18.15                |
| 19-HETE        | 319       | 231     | -95    | -10    | -24    | -11     | 17.85                |
| 20-HETE        | 319       | 245     | -70    | -10    | -22    | -17     | 17.97                |
| 5,6-EET        | 319       | 191     | -65    | -10    | -16    | -12     | 22.03                |
| 8,9-EET        | 319       | 155     | -15    | -10    | -20    | -5      | 22.06                |
| 11,12-EET      | 319       | 167     | -40    | -10    | -22    | -7      | 21.88                |
| 14,15-EET      | 319       | 219     | -60    | -10    | -18    | -7      | 21.09                |
| 5,6-DHET       | 337       | 145     | -5     | -10    | -24    | -27     | 17.68                |
| 8,9-DHET       | 337       | 127     | -45    | -10    | -30    | -13     | 17.44                |
| 11,12-DHET     | 337       | 167     | -100   | -10    | -26    | -17     | 17.22                |
| 14,15-DHET     | 337       | 207     | -35    | -10    | -28    | -9      | 16.98                |
| PGD2           | 351       | 271     | -50    | -10    | -23    | -10     | 15.04                |
| 6-keto-PGF1a   | 369       | 163     | -35    | -10    | -38    | -15     | 13.05                |
| 15-d12,14-PGJ2 | 315       | 271     | -55    | -10    | -22    | -7      | 17.78                |
| TxB2           | 369       | 169     | -50    | -10    | -22    | -10     | 14.17                |
| PGE2           | 351       | 271     | -50    | -10    | -23    | -10     | 14.88                |
| PGF2a          | 353       | 193     | -50    | -10    | -35    | -10     | 14.69                |
| 11(12)-EET-d11 | 330       | 167     | -95    | -10    | -18    | -9      | 21.88                |

**Supplementary Table S2. A list of primer sets for real-time PCR.**

| Organisms     | Name                           | Forward primer                  | Reverse primer                   |
|---------------|--------------------------------|---------------------------------|----------------------------------|
| Mouse         | <i>Gapdh</i>                   | 5'-AGGTCGGTGTGAACGGATTTG-3'     | 5'-TGTAGACCATGTAGTTGAGGTCA-3'    |
|               | <i>Rn18s</i>                   | 5'-GTAACCCGTTGAACCCATT-3'       | 5'-CCATCCAATCGGTAGTAGCG-3'       |
|               | <i>Srebf1</i>                  | 5'-CCGGCTATTCCGTGAACATC -3'     | 5'-GATATCCAAGGGCATATGAGAACT-3'   |
|               | <i>Srebf2</i>                  | 5'-TGTGCGCTCTCGTTTTACTGA -3'    | 5'-GTATAGAAGACGGCCTTCACCAA-3'    |
|               | <i>Mlxipl</i>                  | 5'-CGACACTCACCCACCTCTTC-3'      | 5'-TTGTTCCAGCCGGATCTTGTC-3'      |
|               | <i>Nr1h3</i>                   | 5'-AGGTACAACCCCGGCAGTGA-3'      | 5'-GCAGCTCATTATGGCTCTGGA-3'      |
|               | <i>Nr1h2</i>                   | 5'-GGTGCCAGGGTCTTGCACTG-3'      | 5'-CGTGGTTGTAGCGTCTGGCT-3'       |
|               | <i>Pparg</i>                   | 5'-CGCTGATGCACTGCCTATG-3'       | 5'-AAGTTGGTGGGCCAGAATG-3'        |
|               | <i>Gpam</i>                    | 5'-AGGGCATGTTTGCCACCAGT-3'      | 5'-GGTTCAACTCCGCAGCCACT-3'       |
|               | <i>Scd1</i>                    | 5'-GAGCCACAGAACTTACAAGGCACGG-3' | 5'-TGTGAGGGTCGGCGTGTGTTTC-3'     |
|               | <i>Elovl6</i>                  | 5'-TCAGCAAAGCACCCGAAGTGA-3'     | 5'-ATGAACCAACCACCCAGCGA-3'       |
|               | <i>Fasn</i>                    | 5'- TCCTGGAACGAGAACACGATCT-3'   | 5'- GAGACGTGTCCTCCTGGACTTG -3'   |
|               | <i>Dgat1</i>                   | 5'-GGCCTGCCCCATGCGTGATTATTG-3'  | 5'-TGCCAGAGCAAACACGGAACCCA-3'    |
|               | <i>Dgat2</i>                   | 5'-AACACGCCCAAGAAAGGTGGCAG-3'   | 5'-TGGTGGTCAGCAGGTTGTGTGCTT-3'   |
|               | <i>Cd36</i>                    | 5'-AGATGAATGGTTGAGACCCCGTGCC-3' | 5'-ACCATCCACCAGTTGCTCCACACA-3'   |
|               | <i>Acaca</i>                   | 5'-GCGATCTATCCGTCCGTGGT-3'      | 5'-TGTTGGTCCCTCCAGGCACT-3'       |
|               | <i>Pklr</i>                    | 5'-GTGCCGCAGCCATCATTGTG-3'      | 5'-CAATGACAGCAGCCCGAGGT-3'       |
|               | <i>Pck</i>                     | 5'-TCCCCAAAAGTGGCCTCAGC-3'      | 5'-CCAGTGGCCCCATGCTGAAT-3'       |
|               | <i>G6pc</i>                    | 5'-CATGGGCGCAGCAGGTGTAT-3'      | 5'-AGCTGCACAGCCAGAATCC-3'        |
|               | <i>Slc2a2</i>                  | 5'-TTCTTTGGTGGGTGGCTCGG-3'      | 5'-CAATGATGAGGGCGTGTGCC-3'       |
|               | <i>Tnf</i>                     | 5'-AAAAGCAAGCAGCCAACCAGGCA-3'   | 5'-CACGTCGCGGATCATGCTTTCTGT-3'   |
|               | <i>Il6</i>                     | 5'-TAGTCCTTCTACCCCAATTTTC-3'    | 5'-TTGGTCCTTAGCCACTCCTTC-3'      |
|               | <i>Il10</i>                    | 5'-TGACTGGCATGAGGATCAGCAGGGG-3' | 5'-TAGGAGCATGTGGCTCTGGCCGACT-3'  |
|               | <i>Ccl2</i>                    | 5'-TGTCATGCTTCTGGGCTGCTGT-3'    | 5'-AATGAGTAGCAGCAGGTGAGTGGGG-3'  |
|               | <i>Adgre1</i>                  | 5'-TGGGGCTTTGGCTGCTCCTCTT-3'    | 5'-CCCTGGAGAAGAGCTACGAAGTCC-3'   |
|               | <i>Timp1</i>                   | 5'- ACAGCCTTCTGCAACTCGGACCT-3'  | 5'- GCGGCATTTCCACAGCCTTGA-3'     |
|               | <i>Timp2</i>                   | 5'- TCTTCAGCAGTGTGCGGGTCT-3'    | 5'- GTGCATCTTGCCATCTCCTTCTGCC-3' |
|               | <i>Tgfb1</i>                   | 5'-GGAGCCTGGACACACAGTACAGCAA-3' | 5'-CCACGTAGTAGACGATGGGCAGTGG-3'  |
|               | <i>Tgfb2</i>                   | 5'-TGGCCGAGCAGCGGATTGAACT-3'    | 5'-TCACCCTCCGCTCTGGTTTTTACA-3'   |
|               | <i>Col1a1</i>                  | 5'-TCAGCTTTGTGGACCTCCGGCT-3'    | 5'-ATACCTCGGGTTTCCACGTCTCACC-3'  |
|               | <i>Acta2</i>                   | 5'-CCCTGGAGAAGAGCTACGAAGTCC-3'  | 5'-TGGTTTCGTGGATGCCCGCTGA-3'     |
| <i>Mboat7</i> | 5'-CGCACCTTTCCGCTCCTACGTTTT-3' | 5'-CGCAAGGCTGACTCCAAATAGCCC-3'  |                                  |
| Human         | <i>ACTB</i>                    | 5'-CAAGGCCAACCGGAGAGATGAC-3'    | 5'-AGAGGCGTACAGGGATAGCACAGCC-3'  |
|               | <i>SREBF1</i>                  | 5'-TGCTGGCTCACCTTTCCAGAGCA-3'   | 5'-CTCTGGCTTTGCCTTGCTGCTCCTC-3'  |
|               | <i>PPARG</i>                   | 5'-GCAAACCCCTATTCCATGCTG-3'     | 5'-TGGCATCTCTGTGCAACCAT-3'       |
|               | <i>MLXIPL</i>                  | 5'-TCACACGCCTCTTCGAGTGC-3'      | 5'-ATGGCGTTGTTCCAGGCGGAT-3'      |
|               | <i>FASN</i>                    | 5'-CTTCGGAGTCCACCCCAAGC-3'      | 5'-ACGCCAGTGTGTTCCCTCG-3'        |
|               | <i>ELVOL6</i>                  | 5'-CGGTGGTCCGGACCTAATGA-3'      | 5'-AGCACCAGTTCGAAGAGCACC-3'      |
|               | <i>ACACA</i>                   | 5'-TCCTTGTACCTGCTTCTGTGGCT-3'   | 5'-TGTCTCGGCCCTGCTTTACTAGGTG-3'  |
|               | <i>ACACB</i>                   | 5'-AGCGGGCCATCCGGTTTGTGT-3'     | 5'-ACGGGGACGTAATGATCCGCCA-3'     |
|               | <i>SCD</i>                     | 5'-AGGATGAGGGAAGCGAAGCAAGAGG-3' | 5'-CAGCCACTTTTACCCGAGCCAG-3'     |
|               | <i>DGAT1</i>                   | 5'-GCCTTCTGGTGTGGGTCTGGTGA-3'   | 5'-GCTGCCAGGTTCCAAGTGAAGGA-3'    |
|               | <i>DGAT2</i>                   | 5'-ACACACCAAGAAAGGTGGCAGGA-3'   | 5'-TGGTGGTCAGCAGGTTGTGTGCTT-3'   |
|               | <i>PPARA</i>                   | 5'-TGGTGGACACGGAAGCCACT-3'      | 5'-GCTCGAAGCTGGTGAAGCGTGT-3'     |
|               | <i>CPT1A</i>                   | 5'-GCCATCCTGCTTTACAGGCGCAA-3'   | 5'-CTGAGCGGAGCAGAGTGAATCGT-3'    |
|               | <i>CPT2</i>                    | 5'-TCTTGGGGTGATGGTGTGGCAGT-3'   | 5'-TAGCTGGCTGGCTCTGTGGAGTGA-3'   |

**Supplementary Table S3. A list of primers and probes for Quantitative PCR by the TaqMan System.**

TaqMan System.

| Name          | Assay No.  |
|---------------|------------|
| <i>IL1B</i>   | Hs01555410 |
| <i>IL6</i>    | Hs00174131 |
| <i>CCL2</i>   | Hs00234140 |
| <i>MMP9</i>   | Hs00957562 |
| <i>TIMP1</i>  | Hs00171558 |
| <i>TIMP2</i>  | Hs00234278 |
| <i>TGFB1</i>  | Hs00998133 |
| <i>TGFB2</i>  | Hs00234244 |
| <i>COL1A1</i> | Hs00164004 |
| <i>ACTA2</i>  | Hs00426835 |
| <i>MBOAT7</i> | Hs00383302 |
| <i>ACTB</i>   | Hs01060665 |

**Supplementary Table S4. A list of sgRNA sequences for generating LPIAT1 KO cells.**

| Name   | sgRNA sequences      |
|--------|----------------------|
| MBOAT7 | AGCTACAGCTACTGCTACGT |
